# Supplementary material
Source: PubMed Central journal article supplement (PMC8364868)
Supplement: NIHMS1711543-supplement-1711543_Supp_Info.pdf [file NIHMS1711543-supplement-1711543_Supp_Info.pdf]

**Evaluation of extended efficacy of Dengvaxia vaccine against symptomatic and subclinical dengue infection**

**Supplementary Information**

**Figure S1**

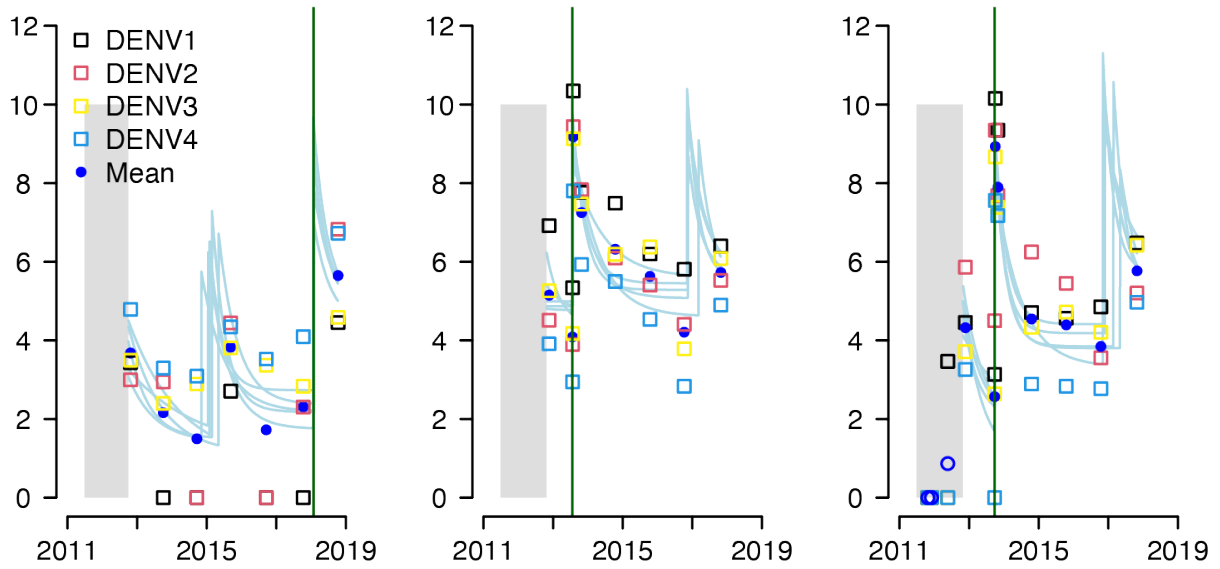

**Figure S1. Example antibody responses during follow-up with serotype data. (A)-(C)** Measured (dots) and modelled (lines) antibody titers for three individuals (same three individuals as Figure 1). Individuals **(A)** and **(C)** were vaccine recipients and **(B)** received a placebo. The dark green lines represent symptomatic infection events.

**Figure S2**

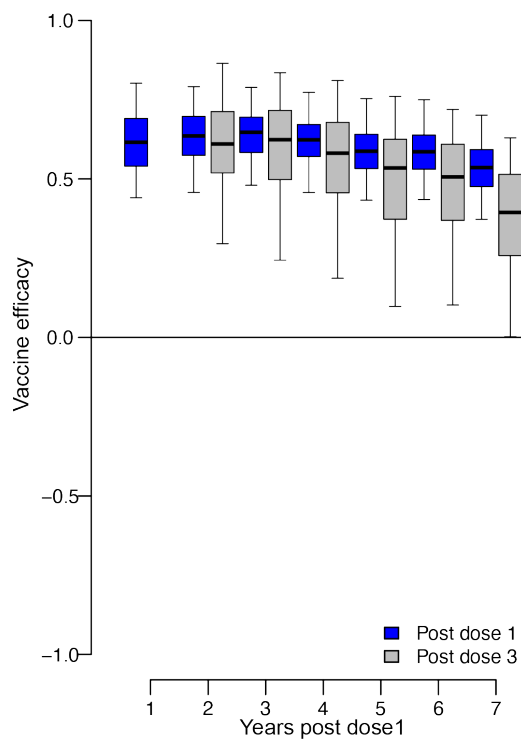

**Figure S2. Vaccine efficacy to symptomatic infection comparing post dose 1 to post dose 3 in baseline seropositive individuals.** Symptomatic infections were detected in all individuals in the first year post the first vaccine dose by Sanofi Pasteur, irrespective of whether they were recruited into the ancillary study. This allows us to compare the cumulative vaccine efficacy when it is calculated from the time of the first dose (blue) with when it is calculated from the third dose (grey). The boxplots represent the mean, the interquartile range and 2.5 and 97.5 percentiles of the estimated vaccine efficacy.

**Figure S3**

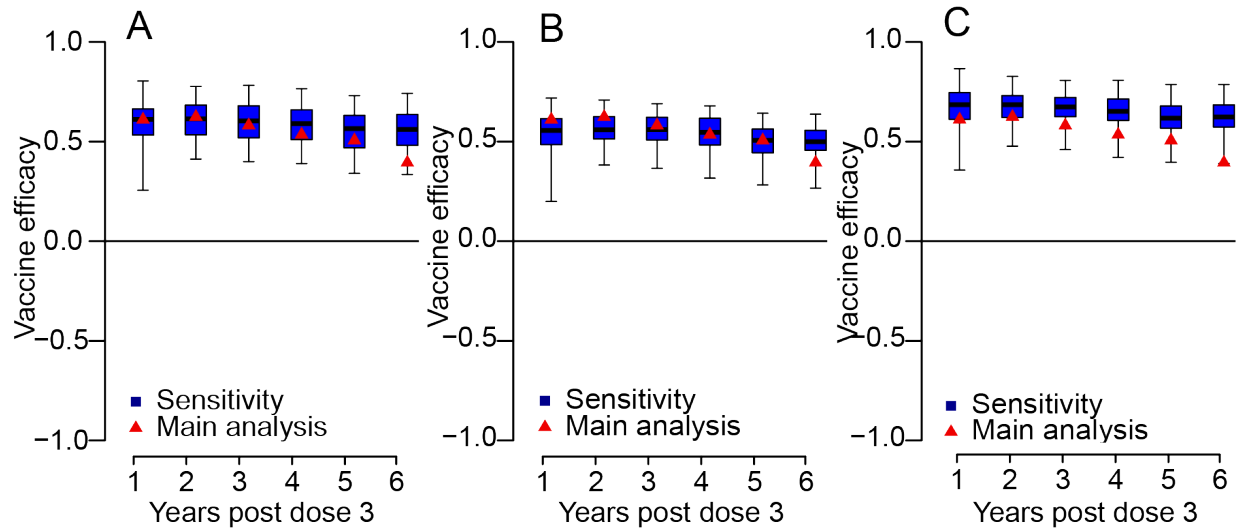

**Figure S3. Sensitivity analysis of baseline serostatus on vaccine efficacy in seropositive individuals. (A)** Sensitivity analysis where there is no temporary protection from an additional infection in the 365 days following an infection event. **(B)** Sensitivity analysis when no adjustment is made for baseline serostatus (i.e., the status at post dose 3 is used). **(C)** Sensitivity analysis where 80% of vaccinated individuals with indeterminate baseline status as per the NS1 assay are assumed to have been seronegative prior to the first vaccine dose. In each panel, the boxplots represent the mean, the interquartile range and 2.5 and 97.5 percentiles of the estimated vaccine efficacy.

**Figure S4**

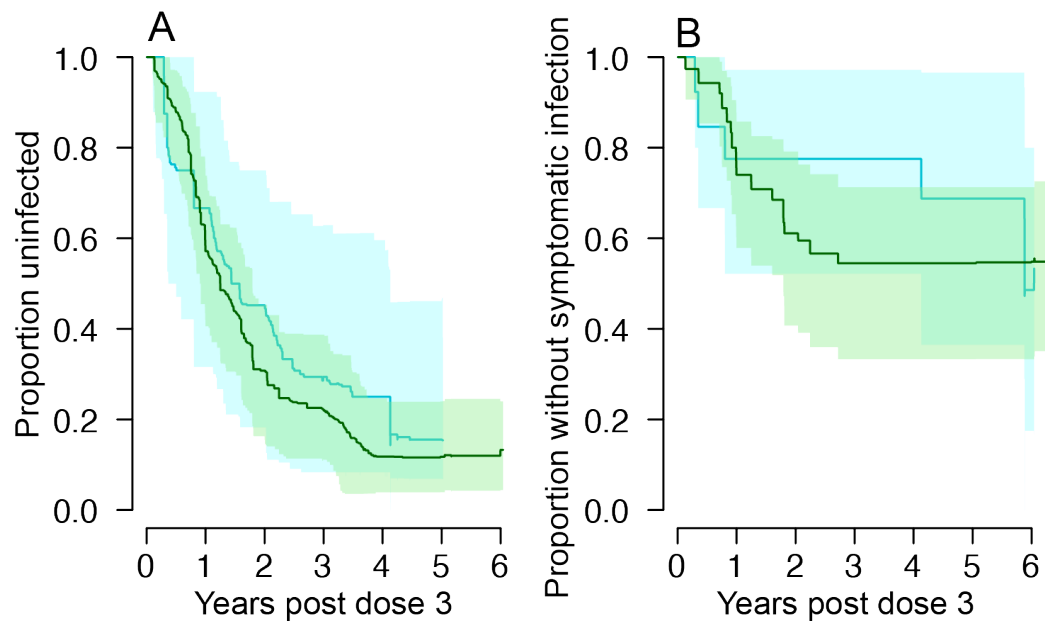

**Figure S4. Time to event in seronegative individuals (A)** Survival from any infection for individuals seronegative at baseline comparing vaccine recipients (green) with placebo recipients (blue). **(B)** Survival from symptomatic infection for individuals seronegative at baseline comparing vaccine recipients (green) with placebo recipients (blue). In each panel, both the mean and 95% confidence intervals are presented.

**Table S1**

|                                       | <b>Placebo</b><br>(N=194) | <b>Vaccine</b><br>(N=417) | <b>Overall</b><br>(N=611) |
|---------------------------------------|---------------------------|---------------------------|---------------------------|
| Mean age at enrollment (range)        | 8.3 (2-14)                | 8.4 (2-14)                | 8.3 (2-14)                |
| No. <5 years at enrollment (%)        | 40 (21%)                  | 70 (17%)                  | 110 (18%)                 |
| No. 5-9 years at enrollment (%)       | 74 (38%)                  | 175 (42%)                 | 249 (41%)                 |
| No. >9 years at enrollment (%)        | 80 (41%)                  | 172 (41%)                 | 252 (41%)                 |
| No. female (%)                        | 101 (52%)                 | 216 (52%)                 | 317 (52%)                 |
| No. recruited prior to first dose (%) | 32 (16%)                  | 80 (19%)                  | 112 (18%)                 |
| No. recruited after third dose (%)    | 162 (84%)                 | 337 (81%)                 | 499 (82%)                 |
| <b>Baseline serostatus</b>            |                           |                           |                           |
| No. seronegative (%)                  | 13 (7%)                   | 36 (9%)                   | 49 (8%)                   |
| No. seropositive (%)                  | 181 (93%)                 | 381 (91%)                 | 562 (92%)                 |

**Table S1. Study participant characteristics.**

**Table S2**

|                                                                                              | <b>Placebo<br/>(N=194)</b> | <b>Vaccine<br/>(N=417)</b> | <b>Overall<br/>(N=611)</b> |
|----------------------------------------------------------------------------------------------|----------------------------|----------------------------|----------------------------|
| <b>Baseline serostatus using NS1 (Vaccine recipients only, N=417)</b>                        |                            |                            |                            |
| No. seronegative (%)                                                                         | -                          | 36/417 (9%)                | -                          |
| No. seropositive (%)                                                                         | -                          | 324/417 (77%)              | -                          |
| No. indeterminate (%)                                                                        | -                          | 57/417 (14%)               | -                          |
| <b>Baseline serostatus using post dose 3 titers (placebo recipients only, N=194)</b>         |                            |                            |                            |
| No. seronegative (%)                                                                         | 11/194 (6%)                | -                          | -                          |
| No. seropositive (%)                                                                         | 183/194 (94%)              | -                          | -                          |
| <b>Baseline serostatus among individuals with pre-dose 1 samples (N=112)</b>                 |                            |                            |                            |
| <i>Serostatus based on pre-dose 1 neutralization titers (N=112):</i>                         |                            |                            |                            |
| No. seronegative (%)                                                                         | 4/32 (13%)                 | 7/80 (9%)                  | 11/112 (10%)               |
| No. seropositive (%)                                                                         | 28/32 (87%)                | 73/80 (91%)                | 101/112 (90%)              |
| <i>Serostatus based on post-dose 3 NS1 test (vaccine recipients only, N=80)</i>              |                            |                            |                            |
| No. seronegative (%)                                                                         | -                          | 7/80 (9%)                  | -                          |
| No. seropositive (%)                                                                         | -                          | 68/80 (85%)                | -                          |
| No. indeterminate (%)                                                                        | -                          | 5/80 (6%)                  | -                          |
| <i>Serostatus based on post-dose 3 neutralization titers (placebo recipients only, N=32)</i> |                            |                            |                            |
| No. seronegative (%)                                                                         | 2/32 (6%)                  | -                          | -                          |
| No. seropositive (%)                                                                         | 30/32 (94%)                | -                          | -                          |

**Table S2. Baseline serostatus as measured through neutralization titers and NS1 assay.**

**Table S3**

|                               | <b>Placebo</b> | <b>Vaccine</b> | <b>Total</b> |
|-------------------------------|----------------|----------------|--------------|
| <i>Prior to dose 3</i>        |                |                |              |
| - DENV1                       | 19             | 13             | 32           |
| - DENV2                       | 3              | 7              | 10           |
| - DENV3                       | 4              | 6              | 10           |
| - DENV4                       | 1              | 0              | 1            |
| Total symptomatic             | 27             | 26             | 53           |
| Of which hospitalized         | 2              | 0              | 2            |
| <i>Post dose 3</i>            |                |                |              |
| - DENV1                       | 4              | 8              | 12           |
| - DENV2                       | 15             | 28             | 43           |
| - DENV3                       | 4              | 12             | 16           |
| - DENV4                       | 4              | 2              | 6            |
| Serotype unknown              | 5              | 5              | 10           |
| Total symptomatic             | 32             | 55             | 87           |
| Of which hospitalized         | 2              | 7              | 9            |
| <i>By baseline serostatus</i> |                |                |              |
| Total hospitalized:           |                |                |              |
| - Seropositive                | 4              | 5              | 9            |
| - Seronegative                | 0              | 2              | 2            |
| Total symptomatic             |                |                |              |
| - Seropositive                | 53             | 62             | 115          |
| - Seronegative                | 6              | 19             | 25           |

**Table S3. Number of symptomatic cases by vaccine and placebo group.**



**Table S4**

| <b>Parameter</b>                                                          | <b>Estimate (95% CrI)</b>      |
|---------------------------------------------------------------------------|--------------------------------|
| <b>Vaccine response</b>                                                   |                                |
| Rise in short-lived antibodies (sero -ve) ( $\gamma^{V,neg}_m$ )          | 3.41 (2.95-3.88)               |
| Rise in short-lived antibodies (sero +ve) ( $\gamma^{V,pos}_m$ )          | 1.94 (1.68-2.24)               |
| Rise in long-lived antibodies (sero -ve) ( $\omega^{V,neg}_m$ )           | 0.90 (0.55-1.27)               |
| Decay in short-lived antibodies (sero -ve) ( $\delta^{V,neg}_m$ )         | 0.0055 (0.0040-0.0071)<br>/day |
| Decay in short-lived antibodies (sero +ve) ( $\delta^{V,pos}_m$ )         | 0.0019 (0.0016-0.0024)<br>/day |
| <b>Natural infection response</b>                                         |                                |
| Rise in short-lived antibodies (placebo) ( $\gamma^{I,plac}_m$ )          | 3.76 (3.44-4.07)               |
| Rise in short-lived antibodies (vaccine sero +ve) ( $\gamma^{I,posV}_m$ ) | 4.23 (3.85-4.60)               |
| Rise in short-lived antibodies (vaccine sero -ve) ( $\gamma^{I,negV}_m$ ) | 5.23 (4.74-5.70)               |
| Rise in long-lived antibodies (placebo) ( $\omega^{I,plac}_m$ )           | 1.34 (1.07-1.62)               |
| Rise in long-lived antibodies (vaccine sero -ve) ( $\omega^{I,negV}_m$ )  | 1.98 (1.45-2.59)               |
| Rise in long-lived antibodies (vaccine sero +ve) ( $\omega^{I,posV}_m$ )  | 1.89 (1.44-2.37)               |
| Decay in short-lived antibodies (all) ( $\delta^I_m$ )                    | 0.0069 (0.0062-0.0076)<br>/day |
| <b>Applicable to all titers</b>                                           |                                |
| Variance in short-lived rise in titers ( $\gamma_V$ )                     | 0.69 (1.53-0.89)               |
| Variance in long-lived rise in titers ( $\omega_V$ )                      | 1.22 (0.84-1.75)               |
| Variance in decay in titers ( $\delta_V$ )                                | 6e-6 (5e-6 - 9e-6)             |
| Assay error (log-titers) ( $\sigma$ )                                     | 0.44 (0.43-0.46)               |
| <b>Force of infection parameters</b>                                      |                                |
| Force of infection in 2012 ( $\lambda$ )                                  | 0.45 (0.38-0.55)               |
| Relative force of infection in 2011 (vs 2012) ( $\beta_{ 2011 }$ )        | 0.93 (0.16-2.55)               |
| Relative force of infection in 2013 (vs 2012) ( $\beta_{ 2013 }$ )        | 1.51 (0.88-2.46)               |
| Relative force of infection in 2014 (vs 2012) ( $\beta_{ 2014 }$ )        | 1.28 (0.78-2.02)               |
| Relative force of infection in 2015 (vs 2012) ( $\beta_{ 2015 }$ )        | 0.93 (0.55-1.50)               |
| Relative force of infection in 2016 (vs 2012) ( $\beta_{ 2016 }$ )        | 0.54 (0.30-0.90)               |
| Relative force of infection in 2017 (vs 2012) ( $\beta_{ 2017 }$ )        | 0.66 (0.38-1.09)               |
| Relative force of infection in 2018 (vs 2012) ( $\beta_{ 2018 }$ )        | 0.37 (0.19-0.66)               |
| Relative force of infection in 2019 (vs 2012) ( $\beta_{ 2019 }$ )        | 0.94 (0.50-1.61)               |

**Table S4. Parameter estimates**

**Table S5**

| <b>Serotype</b> | <b>Strain</b> | <b>Origin</b> | <b>Year</b> |
|-----------------|---------------|---------------|-------------|
| DENV1           | 16007         | Thailand      | 1964        |
| DENV2           | 16681         | Thailand      | 1964        |
| DENV3           | 16562         | Philippines   | 1964        |
| DENV4           | C0036/06      | Thailand      | 2006        |

**Table S5. Reference viruses used in assay.**
